# Supplementary material
Source: Research Square preprint supplement (doi:10.21203/rs.3.rs-8834204/v1)
Supplement: Supplementary file 1 [file aec67644687a762762bd7c3f.docx]

### **Supplementary Figure 1. Distribution of Clinical or Regional Characteristics**


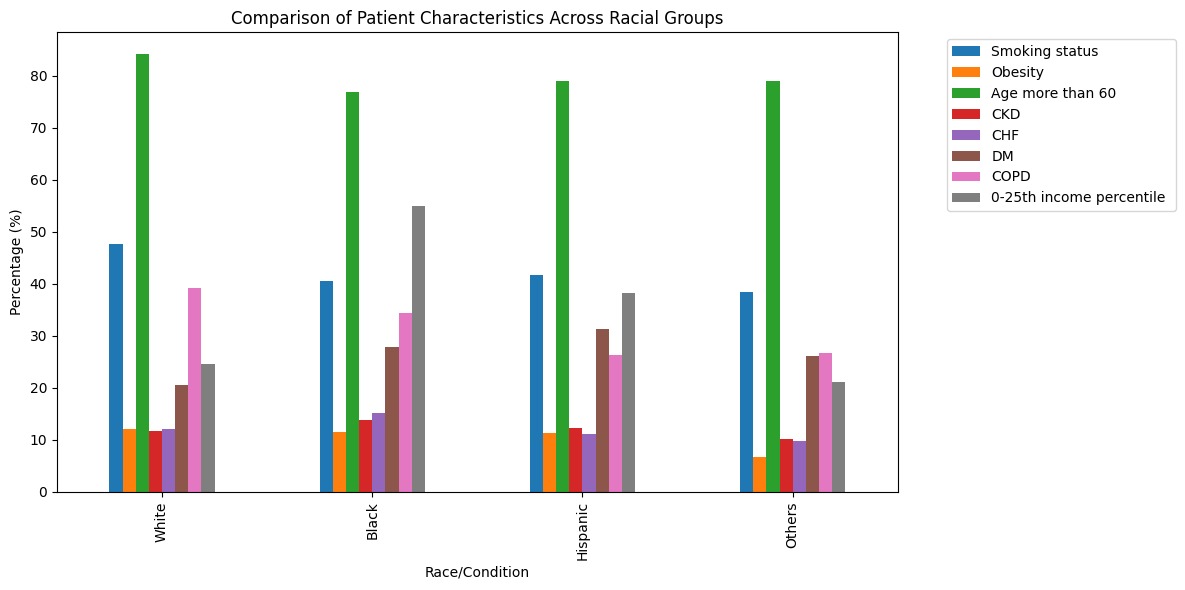


### **Supplementary Figure 2. Distribution of Clinical or Regional Characteristics**


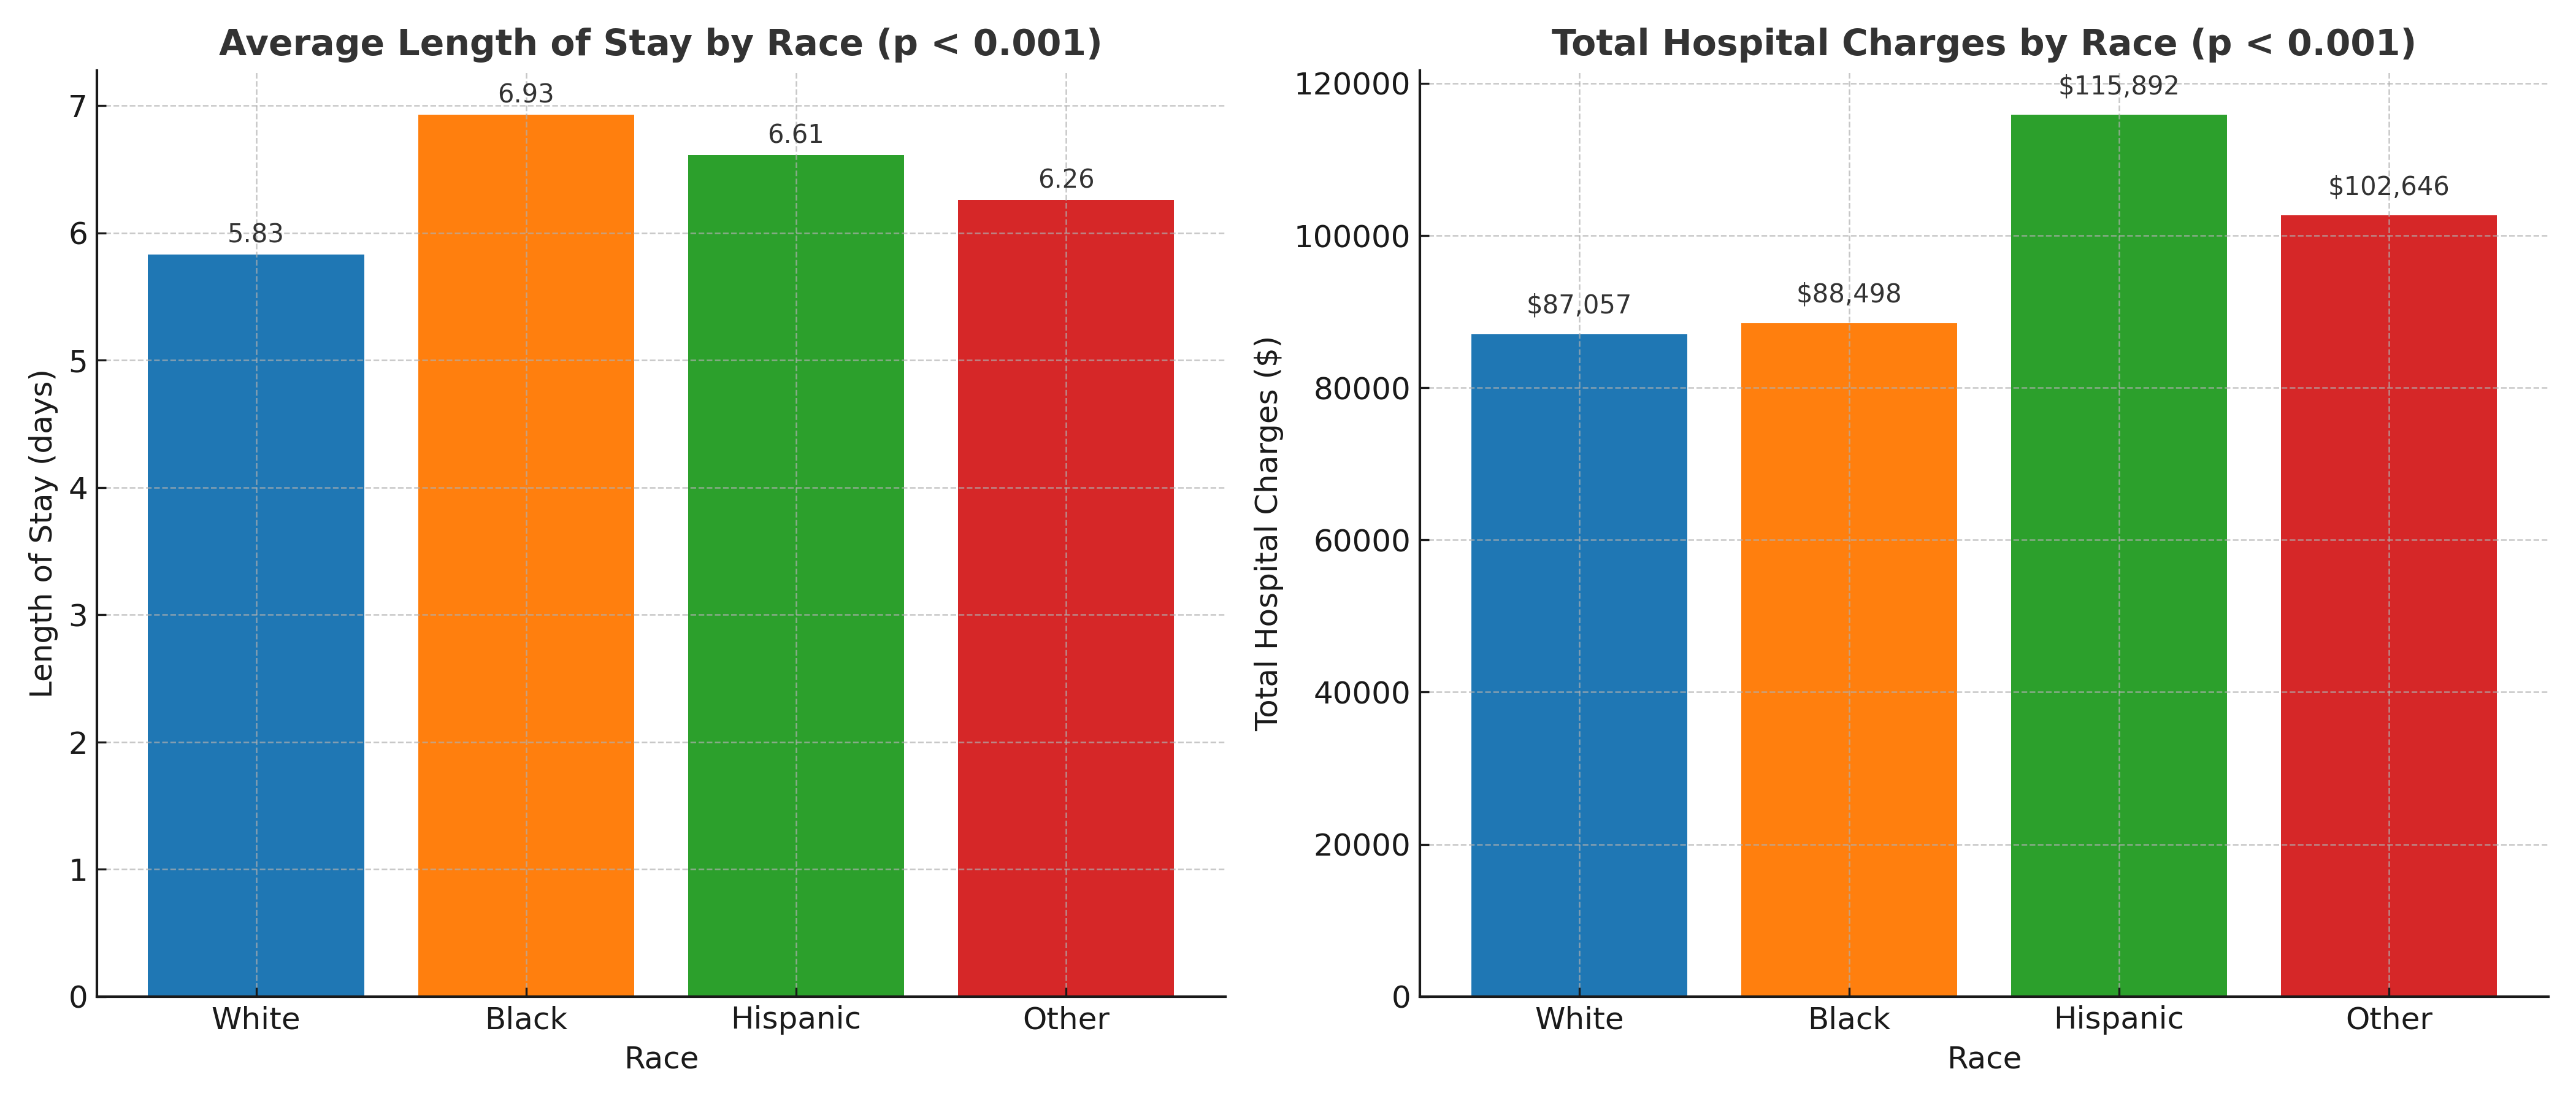


### **Supplementary Figure 3. Distribution of Clinical or Regional Characteristics**


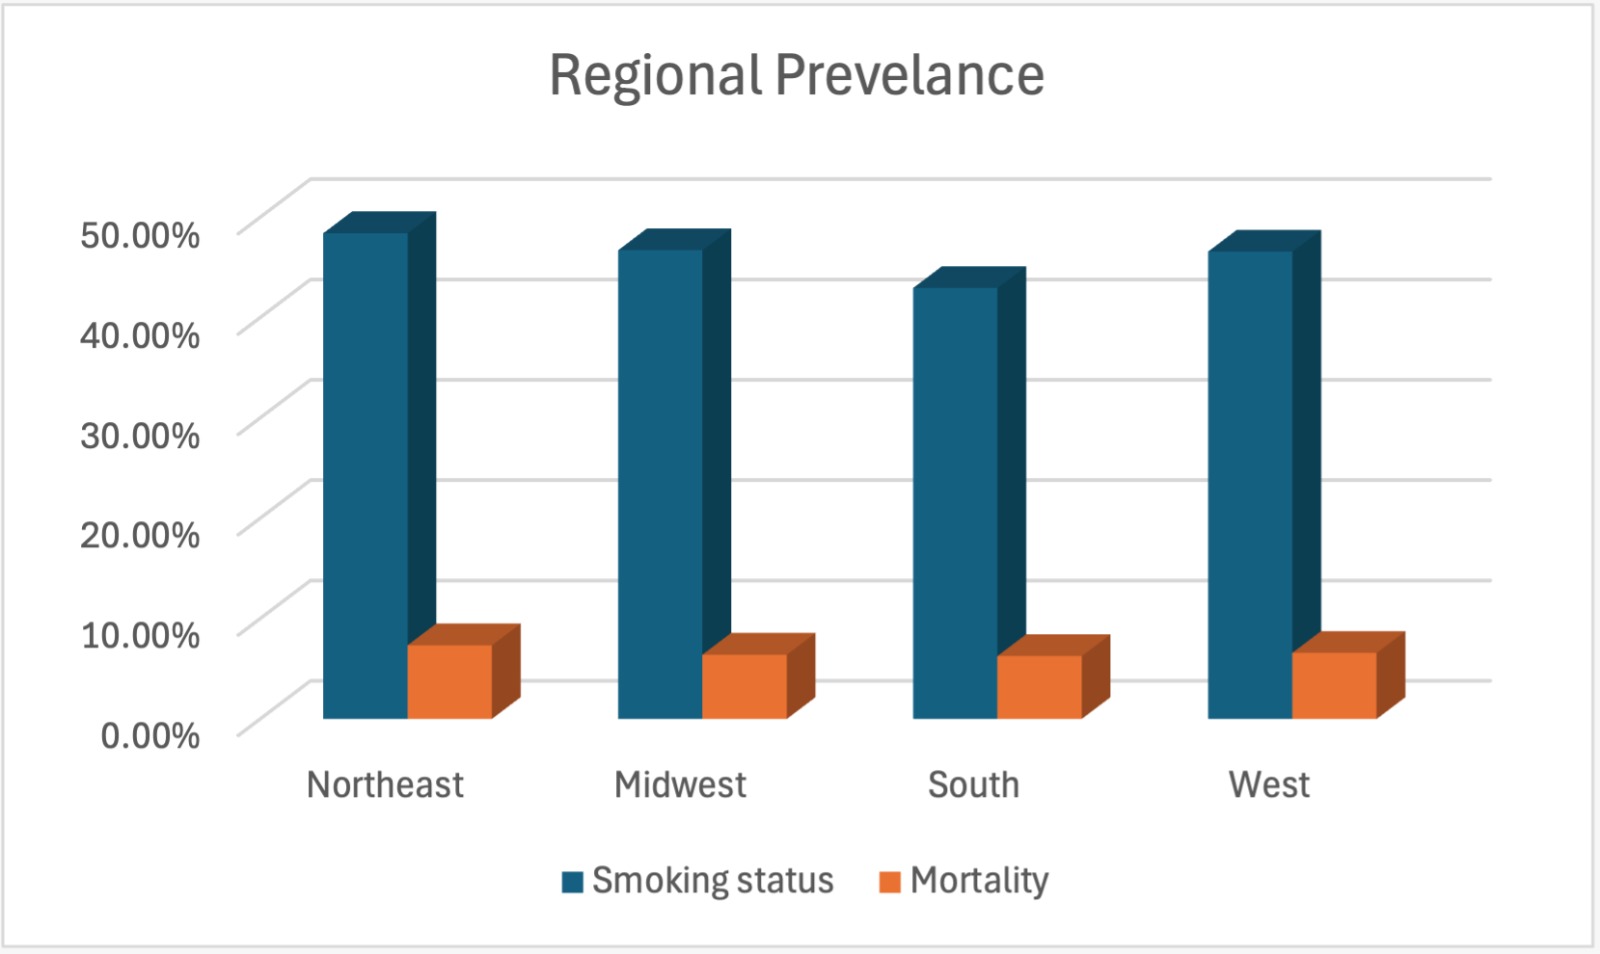


## **Supplementary Table 1. Regression Analysis of LOS by Race**

| Variable | Coefficient | Std. Error | 95% CI | P-value |
| --- | --- | --- | --- | --- |
| Race (catgRACE) | 0.262 | 0.041 | 0.182–0.342 | <0.001 |

**Supplementary Table 2. Multivariable Survey-Weighted Linear Regression for Length of Stay**

**Outcome:** Length of stay (days)
**Reference groups:** White race, male sex, income quartile 1, hospital region 1

| **Variable** | **β (days)** | **95% CI** | **P value** |
| --- | --- | --- | --- |
| **Race** |  |  |  |
| Black vs White | +0.42 | 0.30–0.54 | <0.001 |
| Hispanic vs White | +0.29 | 0.14–0.44 | <0.001 |
| Other vs White | +0.21 | 0.08–0.34 | 0.002 |
| Female sex | −0.37 | −0.49 to −0.25 | <0.001 |
| COPD | +0.71 | 0.58–0.84 | <0.001 |
| Congestive heart failure | +1.55 | 1.33–1.76 | <0.001 |
| Diabetes mellitus | −0.03 | −0.17 to 0.11 | 0.651 |
| Chronic kidney disease | +0.42 | 0.24–0.61 | <0.001 |
| Smoking | −0.89 | −1.01 to −0.78 | <0.001 |
| Age >60 years | −0.20 | −0.37 to −0.04 | 0.017 |
| Obesity | +0.16 | −0.02 to 0.34 | 0.088 |
| Income quartile 2 vs 1 | −0.36 | −0.53 to −0.20 | <0.001 |
| Income quartile 3 vs 1 | −0.58 | −0.75 to −0.41 | <0.001 |
| Income quartile 4 vs 1 | −0.62 | −0.82 to −0.43 | <0.001 |
| Region 2 vs 1 | −0.30 | −0.60 to −0.01 | 0.043 |
| Region 3 vs 1 | −0.07 | −0.36 to 0.21 | 0.616 |
| Region 4 vs 1 | −0.40 | −0.72 to −0.07 | 0.016 |

## **Supplementary Table 3. Multivariable Survey-Weighted Linear Regression for Total Hospital Charges**

**Outcome:** Total hospital charges (USD)
**Reference groups:** White race, male sex, income quartile 1, hospital region 1

| **Variable** | **β ($)** | **95% CI** | **P value** |
| --- | --- | --- | --- |
| **Race** |  |  |  |
| Black vs White | +3,920 | 2,100–5,740 | <0.001 |
| Hispanic vs White | +12,860 | 9,320–16,400 | <0.001 |
| Other vs White | +7,430 | 4,110–10,750 | <0.001 |
| Female sex | −6,125 | −7,920 to −4,329 | <0.001 |
| COPD | +7,688 | 5,542–9,834 | <0.001 |
| Congestive heart failure | +7,259 | 3,949–10,569 | <0.001 |
| Diabetes mellitus | −143 | −2,439 to 2,153 | 0.903 |
| Chronic kidney disease | +1,414 | −1,609 to 4,437 | 0.359 |
| Smoking | −7,497 | −9,426 to −5,568 | <0.001 |
| Age >60 years | −2,678 | −5,562 to 205 | 0.069 |
| Obesity | +13,644 | 10,703–16,586 | <0.001 |
| Income quartile 2 vs 1 | +2,420 | −672 to 5,511 | 0.125 |
| Income quartile 3 vs 1 | −861 | −3,814 to 2,092 | 0.568 |
| Income quartile 4 vs 1 | +6,344 | 2,099–10,588 | 0.003 |
| Region 2 vs 1 | −18,195 | −24,220 to −12,169 | <0.001 |
| Region 3 vs 1 | −5,082 | −11,444 to 1,279 | 0.117 |
| Region 4 vs 1 | +24,812 | 15,974–33,651 | <0.001 |
